# Supplementary material for: Protein visualization and manipulation in Drosophila through the use of epitope tags recognized by nanobodies
Source: eLife journal article supplement (doi:10.7554/elife.74326), 2022-01-25
Supplement: fig4-data1 [file elife-74326-fig4-data1-v2.zip]

2020.7.29 Anti-GFP

Western blot

1. Bp-GFP-WH1

2. Bp-GFP-WH2

3. Bp-GFP-WH3

4. Bp-GFP-WH4

5. Bp-GFP-WH5

Anti-GFP

Western blot

1. Bp-GFP-WH1

2. Bp-GFP-WH2

3. Bp-GFP-WH3

4. Bp-GFP-WH4

5. Bp-GFP-WH5

6. Bp-GFP-WH6

7. Bp-GFP-WH7

8. Bp-GFP-WH8

9. Bp-GFP-WH9

10. Bp-GFP-WH10

11. Bp-GFP-WH11

12. Bp-GFP-WH12

13. Bp-GFP-WH13

14. Bp-GFP-WH14

15. Bp-GFP-WH15

16. Bp-GFP-WH16

17. Bp-GFP-WH17

18. Bp-GFP-WH18

19. Bp-GFP-WH19

20. Bp-GFP-WH20

21. Bp-GFP-WH21

22. Bp-GFP-WH22

23. Bp-GFP-WH23

24. Bp-GFP-WH24

25. Bp-GFP-WH25

26. Bp-GFP-WH26

27. Bp-GFP-WH27

28. Bp-GFP-WH28

29. Bp-GFP-WH29

30. Bp-GFP-WH30

31. Bp-GFP-WH31

32. Bp-GFP-WH32

33. Bp-GFP-WH33

34. Bp-GFP-WH34

35. Bp-GFP-WH35

36. Bp-GFP-WH36

37. Bp-GFP-WH37

38. Bp-GFP-WH38

39. Bp-GFP-WH39

40. Bp-GFP-WH40

41. Bp-GFP-WH41

42. Bp-GFP-WH42

43. Bp-GFP-WH43

44. Bp-GFP-WH44

45. Bp-GFP-WH45

46. Bp-GFP-WH46

47. Bp-GFP-WH47

48. Bp-GFP-WH48

49. Bp-GFP-WH49

50. Bp-GFP-WH50

51. Bp-GFP-WH51

52. Bp-GFP-WH52

53. Bp-GFP-WH53

54. Bp-GFP-WH54

55. Bp-GFP-WH55

56. Bp-GFP-WH56

57. Bp-GFP-WH57

58. Bp-GFP-WH58

59. Bp-GFP-WH59

60. Bp-GFP-WH60

61. Bp-GFP-WH61

62. Bp-GFP-WH62

63. Bp-GFP-WH63

64. Bp-GFP-WH64

65. Bp-GFP-WH65

66. Bp-GFP-WH66

67. Bp-GFP-WH67

68. Bp-GFP-WH68

69. Bp-GFP-WH69

70. Bp-GFP-WH70

71. Bp-GFP-WH71

72. Bp-GFP-WH72

73. Bp-GFP-WH73

74. Bp-GFP-WH74

75. Bp-GFP-WH75

76. Bp-GFP-WH76

77. Bp-GFP-WH77

78. Bp-GFP-WH78

79. Bp-GFP-WH79

80. Bp-GFP-WH80

81. Bp-GFP-WH81

82. Bp-GFP-WH82

83. Bp-GFP-WH83

84. Bp-GFP-WH84

85. Bp-GFP-WH85

86. Bp-GFP-WH86

87. Bp-GFP-WH87

88. Bp-GFP-WH88

89. Bp-GFP-WH89

90. Bp-GFP-WH90

91. Bp-GFP-WH91

92. Bp-GFP-WH92

93. Bp-GFP-WH93

94. Bp-GFP-WH94

95. Bp-GFP-WH95

96. Bp-GFP-WH96

97. Bp-GFP-WH97

98. Bp-GFP-WH98

99. Bp-GFP-WH99

100. Bp-GFP-WH100

101. Bp-GFP-WH101

102. Bp-GFP-WH102

103. Bp-GFP-WH103

104. Bp-GFP-WH104

105. Bp-GFP-WH105

106. Bp-GFP-WH106

107. Bp-GFP-WH107

108. Bp-GFP-WH108

109. Bp-GFP-WH109

110. Bp-GFP-WH110

111. Bp-GFP-WH111

112. Bp-GFP-WH112

113. Bp-GFP-WH113

114. Bp-GFP-WH114

115. Bp-GFP-WH115

116. Bp-GFP-WH116

117. Bp-GFP-WH117

118. Bp-GFP-WH118

119. Bp-GFP-WH119

120. Bp-GFP-WH120

121. Bp-GFP-WH121

122. Bp-GFP-WH122

123. Bp-GFP-WH123

124. Bp-GFP-WH124

125. Bp-GFP-WH125

126. Bp-GFP-WH126

127. Bp-GFP-WH127

128. Bp-GFP-WH128

129. Bp-GFP-WH129

130. Bp-GFP-WH130

131. Bp-GFP-WH131

132. Bp-GFP-WH132

133. Bp-GFP-WH133

134. Bp-GFP-WH134

135. Bp-GFP-WH135

136. Bp-GFP-WH136

137. Bp-GFP-WH137

138. Bp-GFP-WH138

139. Bp-GFP-WH139

140. Bp-GFP-WH140

141. Bp-GFP-WH141

142. Bp-GFP-WH142

143. Bp-GFP-WH143

144. Bp-GFP-WH144

145. Bp-GFP-WH145

146. Bp-GFP-WH146

147. Bp-GFP-WH147

148. Bp-GFP-WH148

149. Bp-GFP-WH149

150. Bp-GFP-WH150

151. Bp-GFP-WH151

152. Bp-GFP-WH152

153. Bp-GFP-WH153

154. Bp-GFP-WH154

155. Bp-GFP-WH155

156. Bp-GFP-WH156

157. Bp-GFP-WH157

158. Bp-GFP-WH158

159. Bp-GFP-WH159

160. Bp-GFP-WH160

161. Bp-GFP-WH161

162. Bp-GFP-WH162

163. Bp-GFP-WH163

164. Bp-GFP-WH164

165. Bp-GFP-WH165

166. Bp-GFP-WH166

167. Bp-GFP-WH167

168. Bp-GFP-WH168

169. Bp-GFP-WH169

170. Bp-GFP-WH170

171. Bp-GFP-WH171

172. Bp-GFP-WH172

173. Bp-GFP-WH173

174. Bp-GFP-WH174

175. Bp-GFP-WH175

176. Bp-GFP-WH176

177. Bp-GFP-WH177

178. Bp-GFP-WH178

179. Bp-GFP-WH179

180. Bp-GFP-WH180

181. Bp-GFP-WH181

182. Bp-GFP-WH182

183. Bp-GFP-WH183

184. Bp-GFP-WH184

185. Bp-GFP-WH185

186. Bp-GFP-WH186

187. Bp-GFP-WH187

188. Bp-GFP-WH188

189. Bp-GFP-WH189

190. Bp-GFP-WH190

191. Bp-GFP-WH191

192. Bp-GFP-WH192

193. Bp-GFP-WH193

194. Bp-GFP-WH194

195. Bp-GFP-WH195

196. Bp-GFP-WH196

197. Bp-GFP-WH197

198. Bp-GFP-WH198

199. Bp-GFP-WH199

200. Bp-GFP-WH200

201. Bp-GFP-WH201

202. Bp-GFP-WH202

203. Bp-GFP-WH203

204. Bp-GFP-WH204

205. Bp-GFP-WH205

206. Bp-GFP-WH206

207. Bp-GFP-WH207

208. Bp-GFP-WH208

209. Bp-GFP-WH209

210. Bp-GFP-WH210

211. Bp-GFP-WH211

212. Bp-GFP-WH212

213. Bp-GFP-WH213

214. Bp-GFP-WH214

215. Bp-GFP-WH215

216. Bp-GFP-WH216

217. Bp-GFP-WH217

218. Bp-GFP-WH218

219. Bp-GFP-WH219

220. Bp-GFP-WH220

221. Bp-GFP-WH221

222. Bp-GFP-WH222

223. Bp-GFP-WH223

224. Bp-GFP-WH224

225. Bp-GFP-WH225

226. Bp-GFP-WH226

227. Bp-GFP-WH227

228. Bp-GFP-WH228

229. Bp-GFP-WH229

230. Bp-GFP-WH230

231. Bp-GFP-WH231

232. Bp-GFP-WH232

233. Bp-GFP-WH233

234. Bp-GFP-WH234

235. Bp-GFP-WH235

236. Bp-GFP-WH236

237. Bp-GFP-WH237

238. Bp-GFP-WH238

239. Bp-GFP-WH239

240. Bp-GFP-WH240

241. Bp-GFP-WH241

242. Bp-GFP-WH242

243. Bp-GFP-WH243

244. Bp-GFP-WH244

245. Bp-GFP-WH245

246. Bp-GFP-WH246

247. Bp-GFP-WH247

248. Bp-GFP-WH248

249. Bp-GFP-WH249

250. Bp-GFP-WH250

251. Bp-GFP-WH251

252. Bp-GFP-WH252

253. Bp-GFP-WH253

254. Bp-GFP-WH254

255. Bp-GFP-WH255

256. Bp-GFP-WH256

257. Bp-GFP-WH257

258. Bp-GFP-WH258

259. Bp-GFP-WH259

260. Bp-GFP-WH260

261. Bp-GFP-WH261

262. Bp-GFP-WH262
