# Supplementary material for: Protein visualization and manipulation in Drosophila through the use of epitope tags recognized by nanobodies
Source: eLife journal article supplement (doi:10.7554/elife.74326), 2022-01-25

2020.3.3

Anti- $\alpha$ TP (fab11)

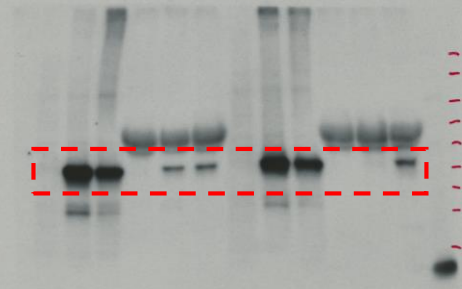

2020.3.3

Antitubulin (mouso)

1. con cell
2. MH5-67P cell
3. Bip-MH5-67P cell
4. con medium
5. MH5-67P-m
6. Bip-MH5-67P-m
7. con cell
8. n2d9-67P cell
9. Bip-n2d9-67P cell
10. con-m
11. n2d9-67P-m
12. Bip-n2d9-67P-m

1 2 3 4 5 6 7 8 9 10 11 12

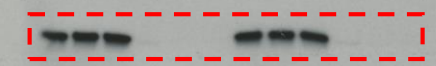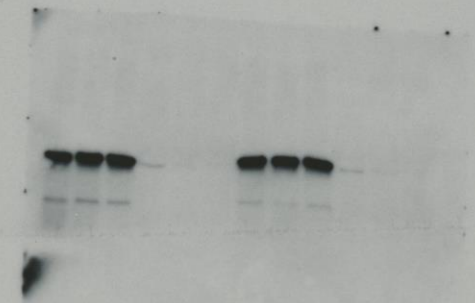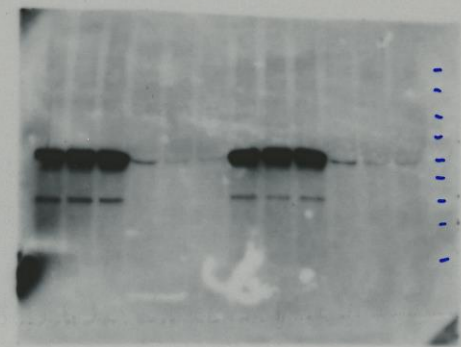

Supplement: fig5-figsupp1-data1 [file elife-74326-fig5-figsupp1-data1-v2.zip]
