# Supplementary figures and images for: Protein visualization and manipulation in Drosophila through the use of epitope tags recognized by nanobodies
Source: eLife journal article supplement (doi:10.7554/elife.74326), 2022-01-25

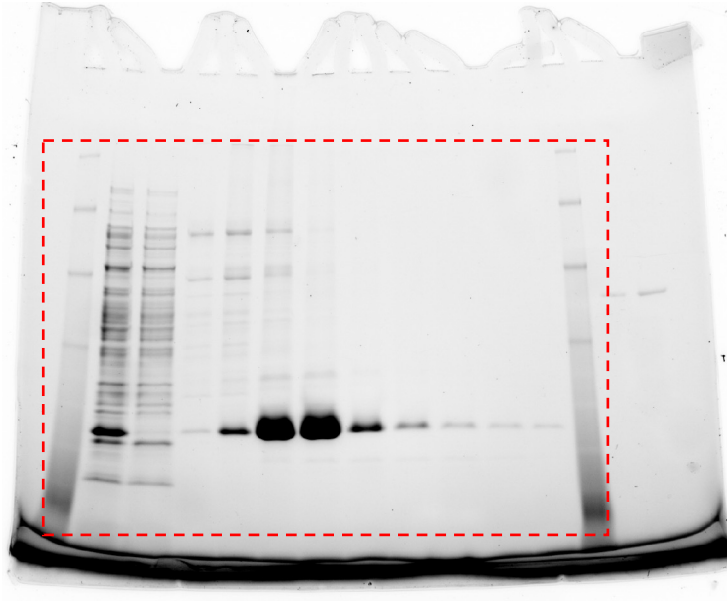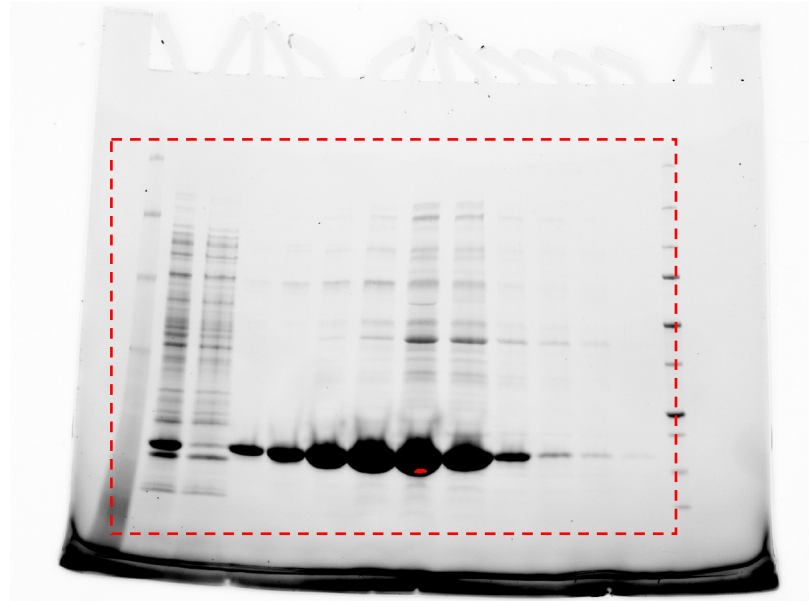

Supplement: fig2-figsupp1-data1 [file elife-74326-fig2-figsupp1-data1-v2.zip]

NbVHH05-ALFA-His

Nb127D01-ALFA-His

Input  
FT  
Elution

Input  
FT  
Elution

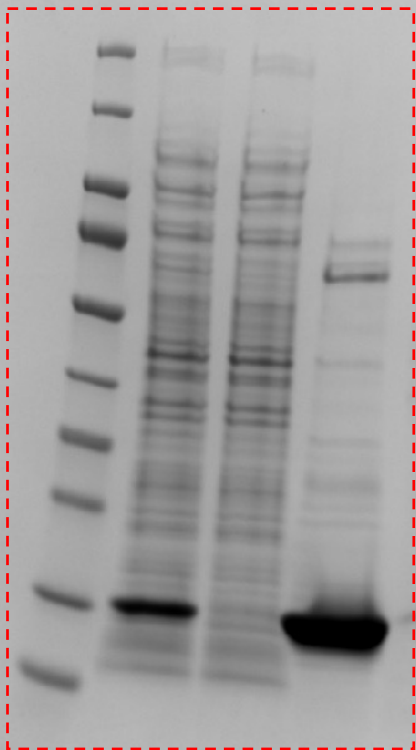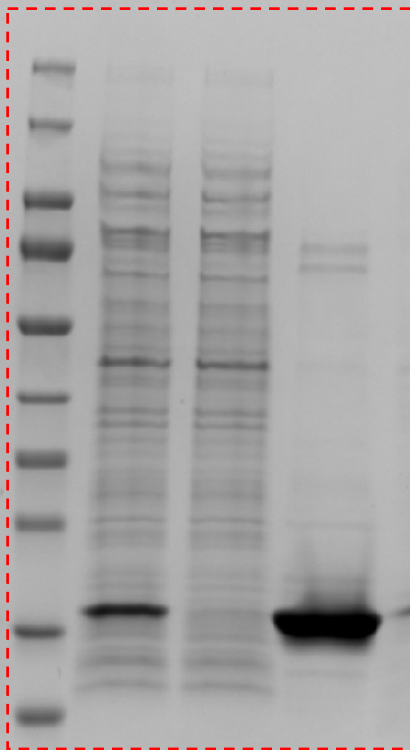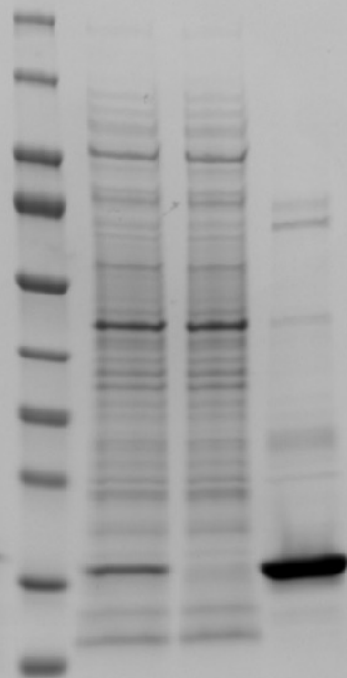

Supplement: fig2-figsupp1-data1 [file elife-74326-fig2-figsupp1-data1-v2.zip]

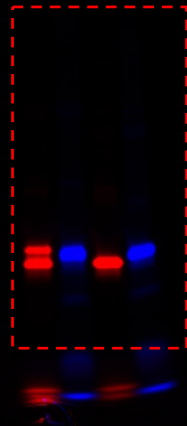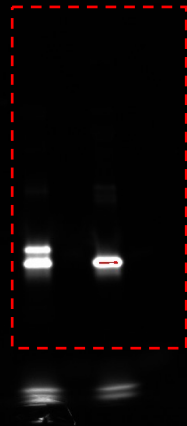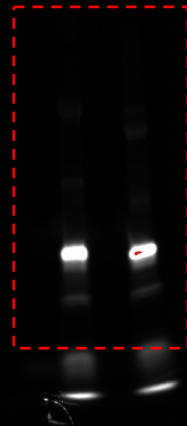

Supplement: fig2-figsupp1-data1 [file elife-74326-fig2-figsupp1-data1-v2.zip]

2020.6.2 - ①

NbVHH05

Nb127D01

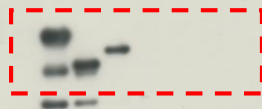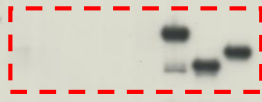

2020.6.2

anti-tubulin

20S

60S

120S

Anti-tubulin

Anti-tubulin

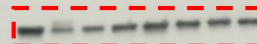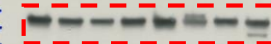

Supplement: fig2-figsupp3-data1 [file elife-74326-fig2-figsupp3-data1-v2.zip]

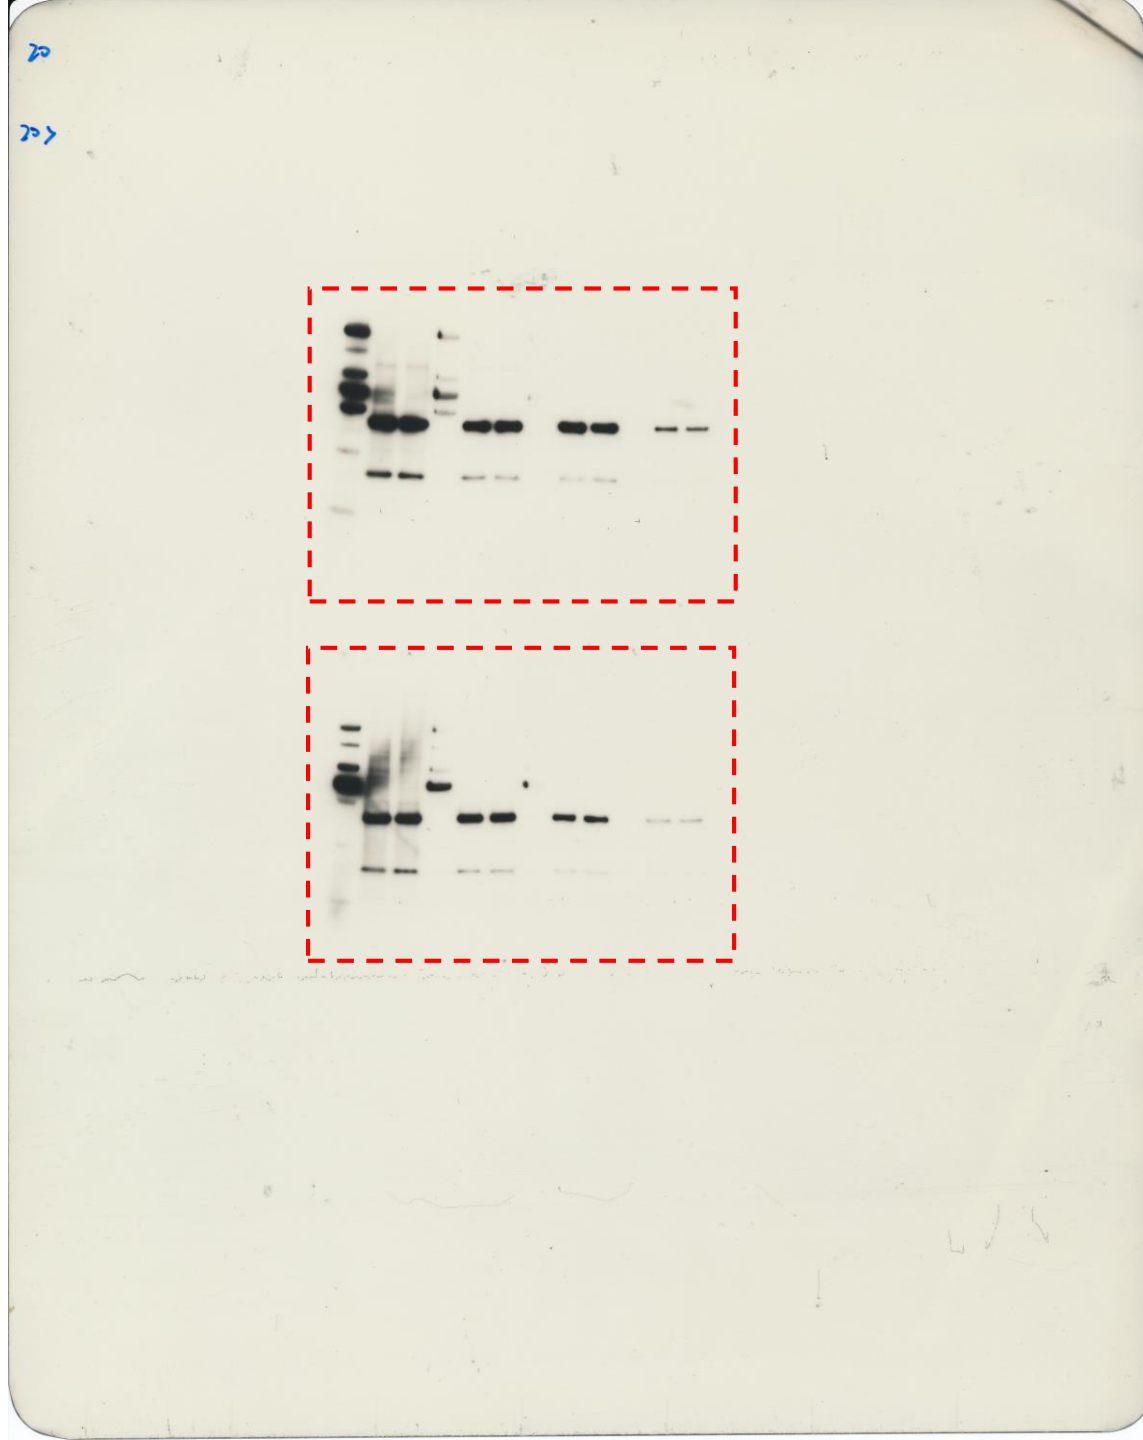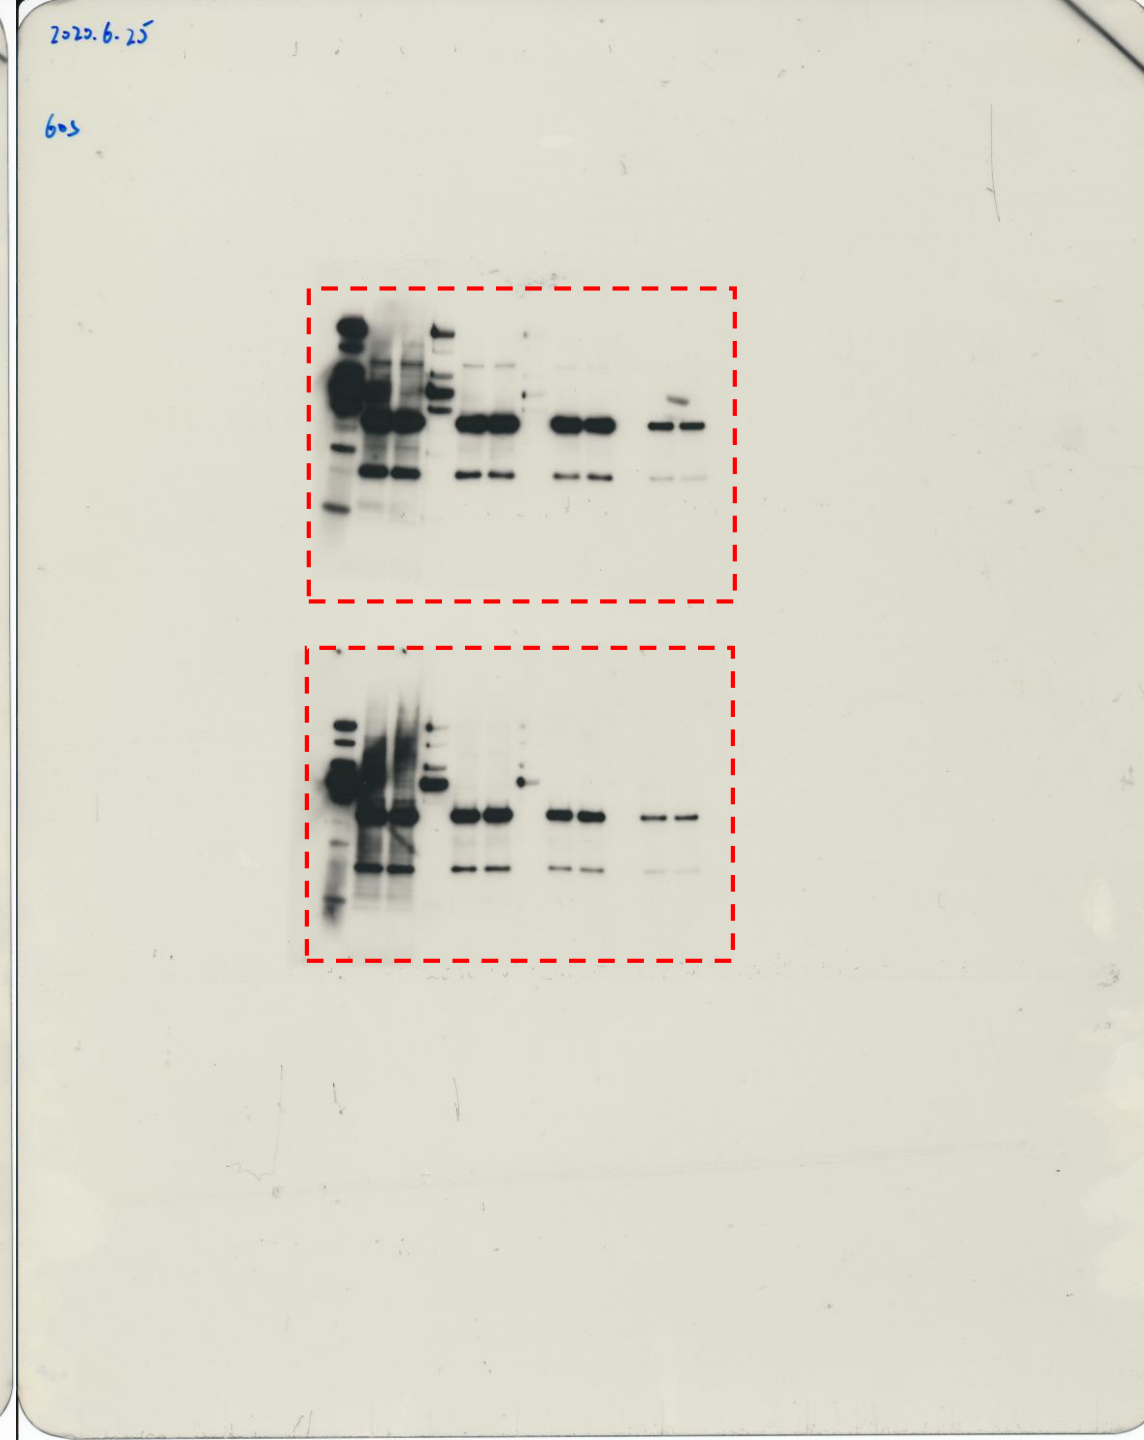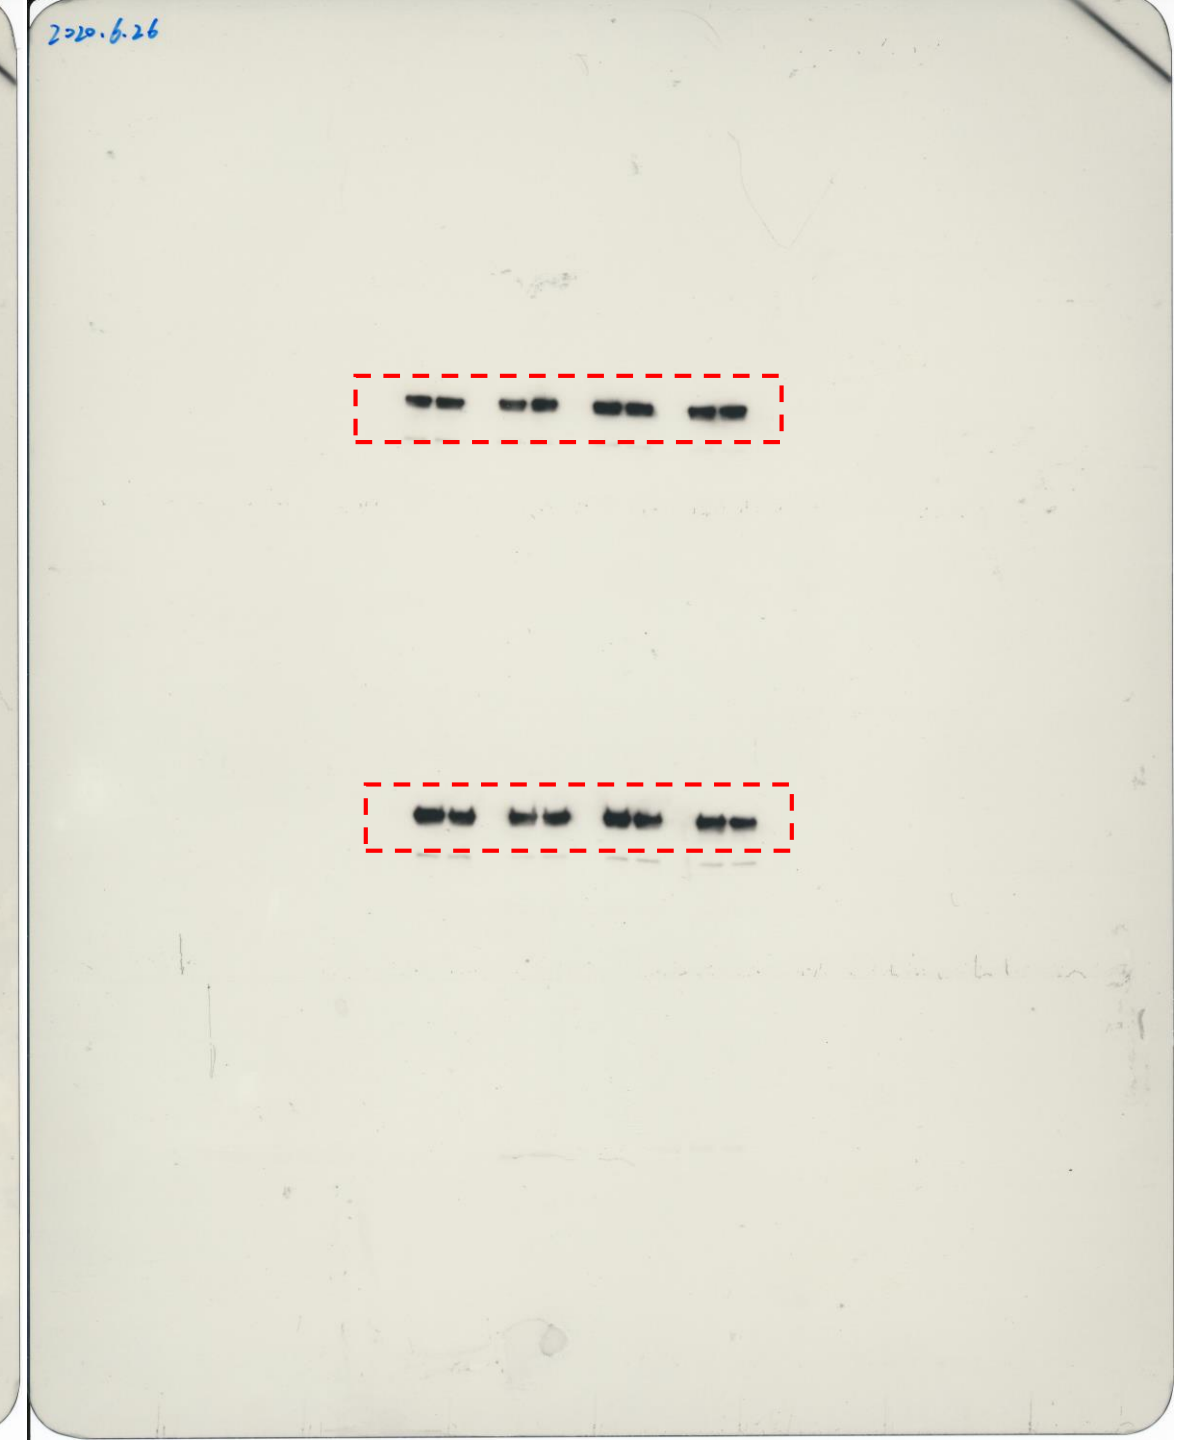

Supplement: fig3-figsupp1-data1 [file elife-74326-fig3-figsupp1-data1-v2.zip]

2020. 7. 12

1. con - m

2. Aklh

3. D:Gp

4. DLP8

5. pml

6. upd6

7. con - m

8. Rept- $\alpha$ 3

9. Rept- $\alpha$ 4 ant- $\alpha$ 4

10. Rept- $\alpha$ 5

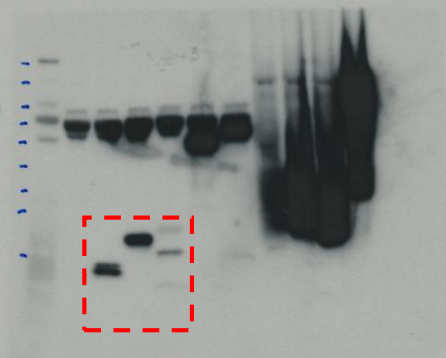

Anti- $\alpha$ 4

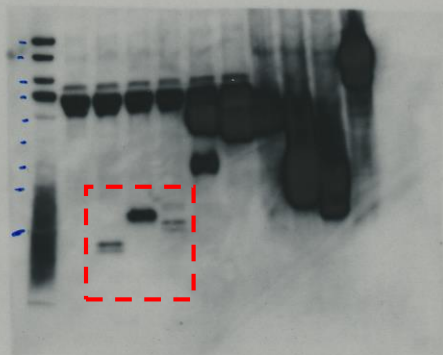

Supplement: fig5-figsupp1-data1 [file elife-74326-fig5-figsupp1-data1-v2.zip]

2020.3.4

anti-HA (mouse)  
anti-tubulin (mouse)

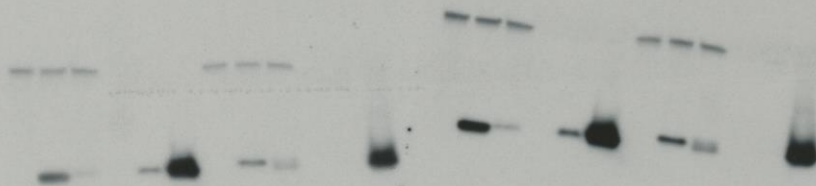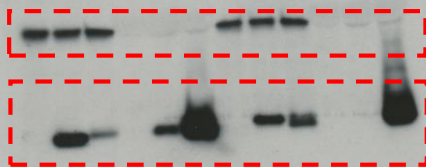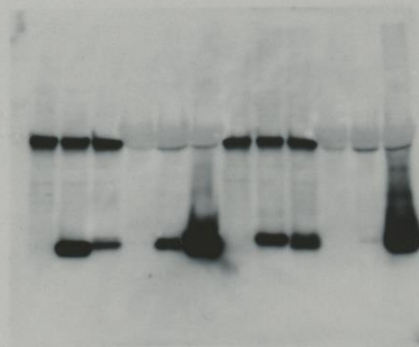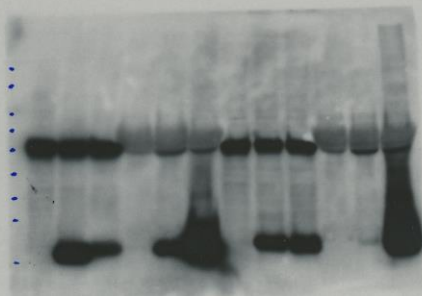

Supplement: fig5-figsupp1-data1 [file elife-74326-fig5-figsupp1-data1-v2.zip]

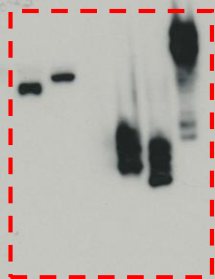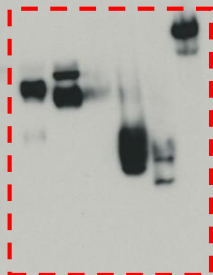

Supplement: fig5-figsupp1-data1 [file elife-74326-fig5-figsupp1-data1-v2.zip]

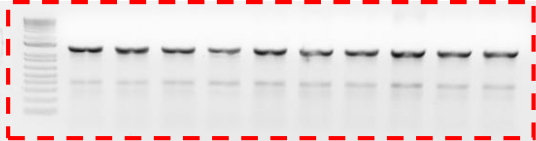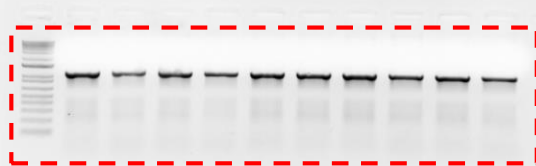

Supplement: fig6-data1 [file elife-74326-fig6-data1-v2.zip]

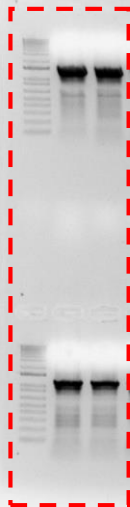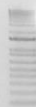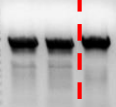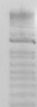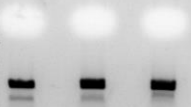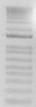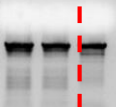

Supplement: fig6-figsupp1-data1 [file elife-74326-fig6-figsupp1-data1-v2.zip]

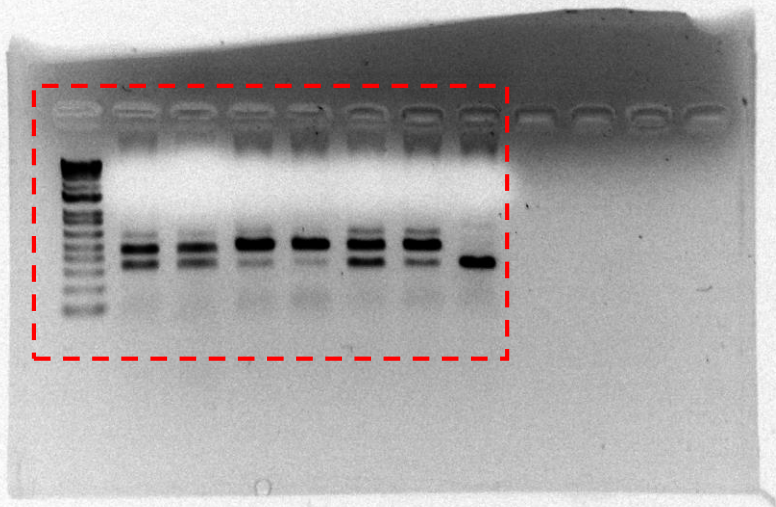

Supplement: fig6-figsupp2-data1 [file elife-74326-fig6-figsupp2-data1-v2.zip]
